# Supplementary material for: The dilution effect and the importance of selecting the right internal control genes for RT-qPCR: a paradigmatic approach in fetal sheep
Source: PubMed Central journal article supplement (PMC4352295; doi:10.1186/s13104-015-0973-7), 2015-02-27
Supplement: 13104_2015_973_MOESM1_ESM.pdf [file 13104_2015_973_MOESM1_ESM.pdf]

### Comparison of relative quantities of 6 ICGs across gestation

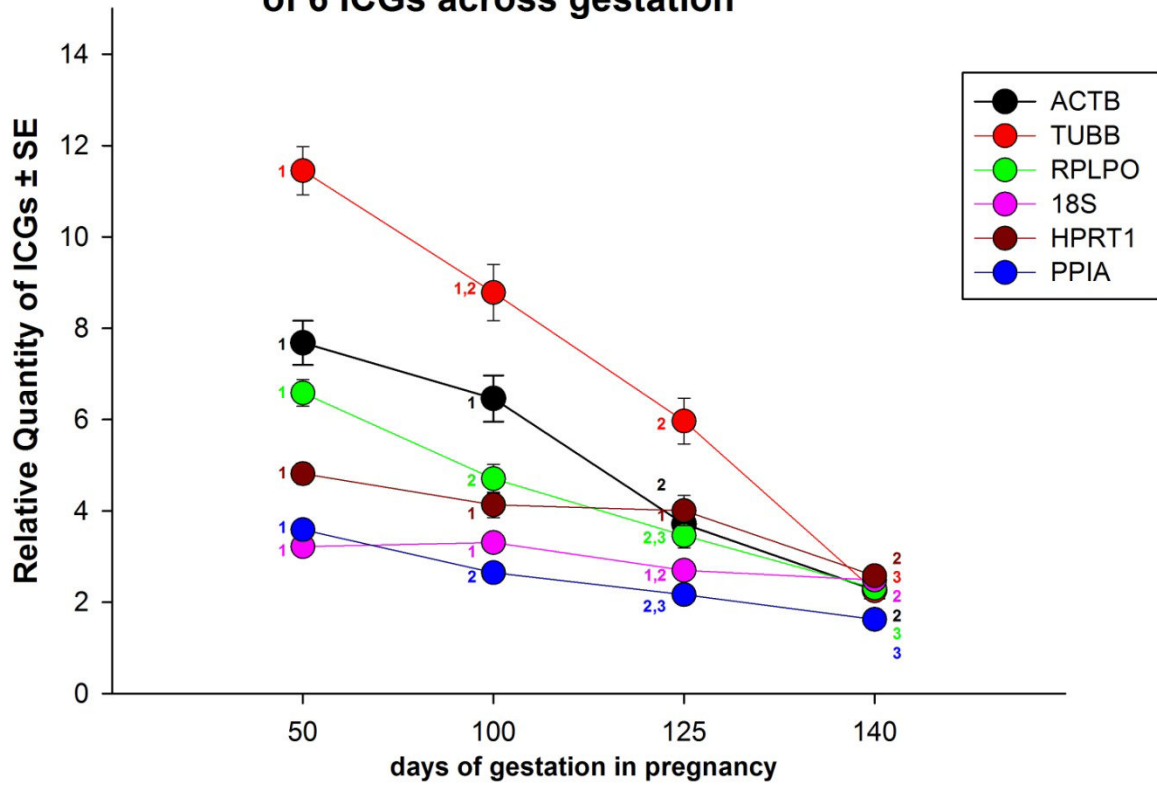

Kruskal-Wallis One Way Analysis of Variance on Ranks: different numbers indicate significant differences in RQ of ICGs (color coded) across gestation with  $p < 0.05$ .  
 Relative Quantity of gene expression =  $\text{efficiency}^{-(ct \text{ min} - ct \text{ sample})}$  : RQmin
